# Supplementary material
Source: publisher figshare collection journal article supplement (https://acs.figshare.com/ndownloader/files/4264267)

1  
2  
3  
4 Preparation of thiol modified Fe<sub>3</sub>O<sub>4</sub>@Ag magnetic SERS probe for  
5 PAHs detection and identification  
6  
7  
8

9 Jingjing Du, Chuanyong Jing<sup>\*</sup>  
10  
11

12 State Key Laboratory of Environmental Chemistry and Ecotoxicology,  
13 Research Center for Eco-Environmental Sciences,  
14 Chinese Academy of Sciences, Beijing 100085, China  
15

16 Tel: +86 10 6284 9523; Fax: +86 10 6284 9523

17 E-mail: cyjing@rcees.ac.cn  
18  
19

## Abstract

*In situ* detection and identification of PAHs, a group of well-known persistent organic pollutants, presents a great challenge to environmental researchers. This study developed a novel substrate based on thiol-functionalized Fe<sub>3</sub>O<sub>4</sub>@Ag core-shell magnetic nanoparticles for surface enhanced Raman scattering (SERS) sensing of PAHs. The surface morphology, structure, and magnetic properties of the substrate were characterized using multiple complimentary techniques including transmission electron microscopy, energy-dispersive X-ray spectroscopy, vibrating sample magnetometry analysis, and extended X-ray absorption fine structure spectroscopy. The high saturation magnetization at 48.35 emu g<sup>-1</sup> enabled the complete and rapid separation of the substrate from the PAHs solution. Benzene, naphthalene, anthracene, phenanthrene, fluorene, pyrene, perylene, and BaP were chosen as probe molecules. Qualitative and quantitative determination of PAHs was achieved using a portable Raman spectrometer. The SERS sensitivity was positively correlated with the hydrophobic nature of PAHs. The SERS response exhibited a linear dependence on the PAHs concentration between 1 to 50 mg/L, and the detection limit in the order 10<sup>-5</sup> to 10<sup>-7</sup> M was obtained. The SERS platform with magnetic substrate provides a new way for *in situ* PAHs monitoring.

Keywords: SERS; PAHs; magnetic; core-shell; modification

## Introduction

Polycyclic aromatic hydrocarbons (PAHs) are mainly formed during the incomplete combustion of coal and fuels.<sup>1</sup> Most PAHs are highly carcinogenic and persistent in the environment and their concentrations could accumulate up to 300 g/kg in some coal gasification sites.<sup>2,3</sup> According to a recent review, the total PAHs in nature water sources may reach the mg/L level despite their hydrophobic properties.<sup>4</sup> Traditional PAHs identification and quantification methods heavily rely on the usage of expensive instrumentation including high performance liquid chromatography (HPLC), gas chromatography (GC), and GC/mass spectrometry (MS). Most conventional analysis techniques also need a pre-concentration step, which is time and labor-consuming.<sup>5</sup>

In general, PAHs are not present individually but in mixtures, which makes the *in situ* identification of PAHs a challenge.<sup>6</sup> Recently, the surface-enhanced Raman scattering (SERS) provides an alternative method for environmental analyses mainly due to its substantial electromagnetic enhancement induced by local surface plasmon resonance.<sup>7,8</sup> SERS-active analytes must generally have an inherent affinity towards the noble metal surface, where the electromagnetic fields are localized. Unfortunately, the apolar nature of PAHs prevents their approach to polar metal surfaces, thus limiting the SERS application in PAHs detection. Therefore, two approaches have been investigated: the first one is functionalizing silver colloids to capture PAHs to metal surfaces. The

functional entities include calixarenes,<sup>9</sup> dicarbamates,<sup>10</sup> viologen,<sup>11</sup> humic acids,<sup>12</sup> and cyclodextrin.<sup>13</sup> Another method is employing self-assembled thiol and alkylsilane monolayers on the immobilized SERS substrate,<sup>14-17</sup> which makes the metal surface hydrophobic and consequently capable of PAHs adsorption.

SERS substrates are commonly colloidal or immobilized noble metal nanoparticles (NPs). The passive contact between these NPs and the target analyte may constrain the active concentrating of the analyte to the substrate. During the last decades, functionalized core-shell magnetic NPs have been widely investigated with respect to industrial, biomedical, and environmental applications.<sup>18-20</sup> Many efforts have been made to fabricate uniform nanostructures such as silica-coated, silver-coated, and gold-coated magnetic NPs.<sup>21-23</sup> Our recent study shows that with the introduction of functionalized core-shell magnetic NPs, environmental pollutants could be actively adsorbed to the vicinity of SERS substrate and subsequently the SERS sensitivity could be enhanced.<sup>24</sup>

The purpose of this study is to provide a potential application platform for monitoring of PAHs contamination. In the present report, we synthesized a sensitive and recyclable SERS substrate for PAHs identification and detection based on thiol-functionalized Fe<sub>3</sub>O<sub>4</sub>@Ag core-shell magnetic nanomaterial. Benzene and seven PAHs were selected because of their different size and structure, ranging from one to five aromatic-rings (Figure 1), and acridine was chosen as a control. Because thiol layer could embed the

analyte onto the substrate surface, qualitative and quantitative determination of PAHs with good selectivity was achieved using a portable Raman spectrometer. To the best of our knowledge, it is the first time functionalized core-shell magnetic NPs have been used in PAHs determination.

## **Experimental Methods**

**Reagents.** All reagents were of analytical reagent grade and used without further purification. Ferric chloride and ferrous chloride were obtained from Beijing Chemicals Corporation (China); silver nitrate (>99.8%), aqueous ammonia (25%), sodium hydroxide (>99.5%), absolute ethanol and hydroxylamine hydrochloride (>99.5%) were from Beijing Chemical Reagents Company (China). PAHs were purchased from J&K Scientific Ltd. (China), 3-aminopropyltrimethoxysilane (APTMS, 97%) was from Aldrich Chemicals Corporation (USA). 1-pentanethiol (99%) was purchased from Tokyo Chemical Industry. Co. Ltd. (Japan), and was referred to as C5 for brevity. Milli-Q water was used in all experiments. A standard reference material, the coal fly ash sample (GBW 08403) were obtained from the State Quality Inspection Administration of China, and their concentrations are listed in Table S1 in the Supporting Information (SI).

**Preparation of thiol functionalized  $\text{Fe}_3\text{O}_4@\text{Ag}$  NPs.** The protocol used for substrate preparation and SERS detection of PAHs is shown in Figure 2. The magnetic  $\text{Fe}_3\text{O}_4@\text{Ag}$  NPs were prepared following our previous work.<sup>24</sup> The as-prepared  $\text{Fe}_3\text{O}_4@\text{Ag}$  particles

were washed by ethanol three times and redispersed in 10 mL ethanol. To the above solutions, 10  $\mu$ L thiol was slowly added and the reaction was kept for 4 h. The product was washed with 20 mL ethanol twice to remove the excess thiol. The thiol coated substrate can be stored in ethanol for more than three months before use.

**Characterization.** The size and morphology of  $\text{Fe}_3\text{O}_4$  and  $\text{Fe}_3\text{O}_4@\text{Ag}$  NPs were characterized by transmission electron microscopy (TEM, JEM-1400 from JEOL Ltd.) The energy dispersive X-ray spectrometry (EDX) analysis was carried out using a HITACHI S-3000N SEM with an Oxford energy dispersive X-ray analyzer. Magnetic properties were measured by a vibration sample magnetometer at room temperature. Raman and SERS spectra were obtained using a portable Raman spectrometer (Enwave Optronics, Inc. USA) with a  $4\text{ cm}^{-1}$  resolution at 785 nm excitation energy. The EXAFS spectra at the Ag K-edge (25,514 eV) were collected at beamline BL01C at National Synchrotron Radiation Research Center, Taiwan. The electron storage ring was operated at 1.5 GeV with a fixed current of 300 mA. The SERS substrate samples were sealed in two layers of Kapton tape and positioned at  $45^\circ$  to the X-ray beam in a cryostat for fluorescence measurement. The EXAFS data analysis followed the standard procedure detailed in our previous report.<sup>25</sup>

**Sample preparation for SERS analysis.** The PAHs alcohol solutions were prepared in concentration range 0.1 to 50 mg/L. To collect the SERS spectra of PAHs mixture,

perylene, benzo[a]pyrene (BaP), pyrene, anthracene, and phenanthrene were diluted in ethanol at concentrations of 1.0 and 10 mg/L, respectively. A control sample was also prepared by adding acridine into the PAHs mixture. The thiol-coated NPs were immersed in a 10 mL ethanol solution containing various concentrations of PAHs for 1 h. Then, the NPs were assembled by an applied magnetic field, and exposed to the laser for 5 s to measure the SERS signal.

## Result and Discussion

**Substrate characterization.** The TEM micrograph in Figure 3 demonstrates that  $\text{Fe}_3\text{O}_4@\text{Ag}$  NPs with particle size of  $50 \pm 20$  nm and silver shell thickness at 5 nm were successfully synthesized. The EDX spectrum as shown in SI Figure S1 also served as an important evidence for the existence of Ag shell on the  $\text{Fe}_3\text{O}_4$  surface. The superparamagnetism of  $\text{Fe}_3\text{O}_4@\text{Ag}$  NPs was confirmed with a vibrating sample magnetometer. The maximum magnetic strength was evaluated by the saturation magnetization (SM), which were 59.15 emu/g for  $\text{Fe}_3\text{O}_4$  and 48.35 emu/g for  $\text{Fe}_3\text{O}_4@\text{Ag}$  NPs (Figure S2). The slight decrease in SM due to Ag coating did not hamper the magnetic separation, because a SM value higher than 16.3 emu/g is sufficient to achieve magnetic separation.<sup>26</sup> The  $k^3$ -weighted Ag K-edge EXAFS spectra are shown in Figure 4-I, and the corresponding radial structure functions are shown in Figure 4-II as magnitude of the Fourier transformation versus radial distance. The EXAFS results listed in SI Table S2

demonstrate the formation of metallic Ag nanoparticles in the substrate with a first shell distance of 0.287 nm.<sup>27</sup>

**Functionalization of substrate with thiol.** Functionalization of Fe<sub>3</sub>O<sub>4</sub>@Ag NPs with 1-pentanethiol (C5) was confirmed with SERS spectra illustrated in Figure 5-I. After coating C5 on Fe<sub>3</sub>O<sub>4</sub>@Ag NPs, the Raman shifts were observed at 638 cm<sup>-1</sup> (gauche C-S stretch), 700 cm<sup>-1</sup> (trans C-S stretch), 744 cm<sup>-1</sup> (gauche CH<sub>2</sub> rock), 895 cm<sup>-1</sup> (CH<sub>3</sub> rock), 1056 cm<sup>-1</sup> (trans C-C), 1107 cm<sup>-1</sup> (trans C-C), and 1443 cm<sup>-1</sup> (CH<sub>3</sub> deformation) (Figure 5-I, c).<sup>28</sup> As compared with normal Raman spectrum of C5 (Figure 5-I, b), a dramatic decrease in intensity at 657 cm<sup>-1</sup> (gauche C-S stretch) and increase of trans C-S stretch (731 cm<sup>-1</sup>) was detected upon C5 modification, suggesting the bonding of C5 to Ag through S heading group.<sup>29</sup>

To confirm the formation of self assembled thiol monolayer (SAM) on substrate surface, SERS analysis of acridine was performed as a control experiment. The peak intensity of acridine at 402, 743, 1401, and 1559 cm<sup>-1</sup> on thiol-modified Ag surface (Figure 5-II, c) decreased dramatically comparing with that on blank Ag surface (Figure 5-II, b). The peak assignments for acridine are listed in SI Table S3. Because acridine is vertically adsorbed to Ag surface through nitrogen lone pair electrons,<sup>30,31</sup> the force of interactions between acridine and Ag surface would be significantly reduced upon the addition of thiol. Our hypothesized adsorption mechanisms are sketched in Figure 6. The



good agreement between observation and proposed mechanism proved the successful formation of SAM on Ag surface.

To justify our hypothesis that the PAHs were bound to SAM rather than the surface of  $\text{Fe}_3\text{O}_4@\text{Ag}$  NPs, the SERS signals between  $\text{Fe}_3\text{O}_4@\text{Ag}$  and  $\text{Fe}_3\text{O}_4@\text{Ag}@\text{C5}$  NPs were compared for a mixture of five PAHs and acridine. No PAHs characteristic peak but acridine was observed on the  $\text{Fe}_3\text{O}_4@\text{Ag}$  NPs (Figure 7-b). In contrast, characteristic peaks corresponding to each PAHs were observed on the  $\text{Fe}_3\text{O}_4@\text{Ag}@\text{C5}$  NPs as shown in Figure 7-d. The stark contrast demonstrates that the PAHs bind to the thiol layer.

**Effect of SAM density on SERS sensitivity.** To examine the SAM density on PAHs detection, SERS sensitivity of anthracene, pyrene, and perylene as a function of C5 concentration was compared. As shown in SI Figure S3, the optimal C5 concentration was 0.08 M. The SAM generated with 0.04 and 0.12 M C5 led to a dramatic decrease in SERS intensity. The results demonstrate the importance of desirable SAM density for the successful adsorption of analyte.

**SERS detection of PAHs.** SERS spectra of PAHs on thiol modified substrate are illustrated in Figure 8. The spectra were subtracted from the SERS spectrum of C5 to provide clear information. Figure 8-I shows the SERS difference spectra of perylene, BaP, and pyrene. Normal Raman spectra of the solid PAHs are also presented for comparison, and the positions and assignments of Raman shifts for perylene, BaP, and pyrene are

summarized in SI Tables S4-S6. The SERS peak position of perylene centered at 1571, 1373, 1296, 980, 546, and 362  $\text{cm}^{-1}$  corresponded to the Raman shifts of solid perylene.<sup>32</sup> SERS measurement of BaP resulted in peaks at 1583, 1412, 1385, and 1240  $\text{cm}^{-1}$ , which is consistent with BaP Raman peaks.<sup>33</sup> In the case of pyrene, small frequency shifts around 2-4  $\text{cm}^{-1}$  were observed as compared to its normal Raman spectrum.<sup>34</sup> An intensification was identified with the symmetric  $a_g$  mode at 594  $\text{cm}^{-1}$  for pyrene, suggesting an enhancement through the Frank-Condon resonance mechanism.<sup>35</sup>

Having detected the three PAHs with 4-5 aromatic rings, SERS measurement of PAHs with three rings was conducted, and the results are shown in Figure 8-II and SI Tables S7-S8. SERS spectrum of anthracene exhibited four major peaks at 393, 756, 1403, and 1555  $\text{cm}^{-1}$ .<sup>13,14</sup> Compared with anthracene, phenanthrene with an asymmetrical structure resulted in more SERS peaks at 411, 547, 712, 1044, 1246, 1420, 1441, 1524, and 1570  $\text{cm}^{-1}$ .<sup>36</sup> The stability of the substrate after mixing with pyrene was examined by EXAFS analysis as shown in Figure 4. The results suggest that the oxidation state and the local coordination environment of metallic Ag were not changed upon the reaction with PAHs (Table S2).

**Chemical selectivity of substrate.** In addition to increasing the surface affinity towards PAHs, the functionalization by thiol group enhanced the selectivity of substrate. The lowest detectable concentrations and the octanol-water partition coefficient,  $K_{ow}$ , of

each PAHs are shown in Table 1. A decrease of SERS sensitivity was observed following the  $K_{ow}$  order perylene > BaP > pyrene > anthracene > phenanthrene. On the other hand, no feature peak was detected for benzene, naphthalene, and fluorene (Figure 8-III). The undetected PAHs have lower molecular mass and  $K_{ow}$  than the detectable ones. The substrate preference for larger PAHs may attribute to increased van der Waals interaction, hydrophobicity, and symmetry.

**Quantitative analysis of PAHs.** To realize the quantitative measurement of PAHs using our technique, SERS spectrum was obtained by exposing the substrate to increasing concentrations of PAHs. The spectra were averaged from ten randomly chosen points on one substrate to obtain reliable results. Since the concentration of C5 was kept constant, the most pronounced C5 band at  $895\text{ cm}^{-1}$  was chosen as a reference peak for the spectra normalization. The intensity ratio of the PAHs bands listed in Table 1 to the C5 bands at  $895\text{ cm}^{-1}$  was employed to study the SERS sensitivity as a function of PAHs concentrations. As shown in Figure 9, the SERS signal was linearly correlated with the PAHs concentration with a  $R^2$  range 0.937 to 0.987. A linear response between PAH concentration and SERS peak magnitude was also observed by Carron et al..<sup>37</sup> The enhancement factor (EF) for each PAHs was calculated using an equation reported in a previous study.<sup>38</sup> As shown in Table 1, the EF in the order of  $10^3$  to  $10^5$  was achieved for small and large PAHs, respectively.

**Identification of PAHs.** Having successfully detected the five PAHs, the thiol functionalized magnetic NPs were also applied in SERS sensing of PAHs in more complex mixtures. The obtained spectra are shown in Figure 10. The key SERS peaks of individual PAHs also are clearly observed and distinguished in the more complex mixture at 1 and 10 mg/L concentration. Furthermore, concentrations of each PAHs in the mixture were calculated using the linear regression equation obtained from Figure 9. Despite the competition among each PAHs, the calculated concentrations (1.03, 1.05, 1.29, and 1.54 mg/L for anthracene, pyrene, perylene, and BaP) were comparable with the added concentration of 1 mg/L. SERS detection of PAHs from the coal fly ash sample was conducted to prove the suitability of our method for screening purposes. A sufficient number of characteristic peaks of individual PAHs were clearly resolved (Figure 10-c). These peaks could be used for rapid screening of PAHs. However, the overlap of peak positions at around  $390\text{ cm}^{-1}$  prevented the accurate quantitative determination of each PAHs.

## **Conclusions**

The present work has demonstrated a facile method to prepare the SAM-functionalized  $\text{Fe}_3\text{O}_4@\text{Ag}$  magnetic SERS substrate. The C5 adsorption modifies the substrate surface for selective PAHs partitioning. The SERS enhancement is observed for the PAHs containing more than three aromatic rings. Qualitative and quantitative determination of

PAHs with detection limit at  $\mu\text{g/L}$  level was achieved, and the SERS response exhibited a linear dependence on PAHs concentrations between 1 to 50 mg/L. The present approach does not require expensive instrumentation or large sample volumes, which should have great applications in the rapid identification of PAHs in complex samples. The sensitivity of this analytical method have opened a new way towards a generalized use of our technique, not only in the laboratory but also in field assays with a portable Raman spectrometer.

**Acknowledgements.** We acknowledge Dr. Ting-Shan Chan on beamline BL01C1 at the National Synchrotron Radiation Research Center (NSRRC) for the assistance with XAS data collection. The research is support by the National Natural Science Foundation of China (20890112, 20921703), the National Hi-tech Research Program of China (2009AA061603), and the National Basic Research Program of China (2009CB421601).

**Supporting Information Available:** EDX spectra of  $\text{Fe}_3\text{O}_4@\text{Ag}$  magnetic nanoparticles; The hysteresis loop of  $\text{Fe}_3\text{O}_4$  and  $\text{Fe}_3\text{O}_4@\text{Ag}$  magnetic nanoparticles; The peak intensity of PAHs as a function of C5 concentration; The pretreatment procedure and PAHs concentrations in the coal fly ash sample; Ag K-edge EXAFS fitting results of  $\text{Fe}_3\text{O}_4@\text{Ag}$  and  $\text{Fe}_3\text{O}_4@\text{Ag}@\text{C5}$  reacted with PAHs; Experimental Raman frequencies of acridine, perylene, BaP, pyrene, anthracene, and phenanthrene.

## References

- (1) Alvarez-Puebla, R. A.; Dos Santos, D. S.; Aroca, R. F. *Analyst* **2007**, *132*, 1210-1214.
- (2) Plaza-Bolanos, P.; Frenich, A. G.; Vidal, J. L. M. *J. Chromatogr. A* **2010**, *1217*, 6303-6326.
- (3) Loick, N.; Hobbs, P. J.; Hale, M. D. C.; Jones, D. L. *Crit. Rev. Environ. Sci. Technol.* **2009**, *39*, 271-332.
- (4) Srogi, K. *Environ. Chem. Lett.* **2007**, *5*, 169-195.
- (5) Schmidt, H.; Ha, N. B.; Pfannkuche, J.; Amann, H.; Kronfeldt, H. D.; Kowalewska, G. *Mar. Pollut. Bull.* **2004**, *49*, 229-234.
- (6) Chen, L.; Zhang, Y.; Liu, B. *Talanta* **2010**, *83*, 324-331.
- (7) Halvorson, R. A.; Vikesland, P. J. *Environ. Sci. Technol.* **2010**, *44*, 7749-7755.
- (8) Schwartzberg, A. M.; Zhang, J. Z. *J. Phys. Chem. C* **2008**, *112*, 10323-10337.
- (9) Leyton, P.; Sanchez-Cortes, S.; Campos-Vallette, M.; Domingo, C.; Garcia-Ramos, J. V.; Saitz, C. *Appl. Spectrosc.* **2005**, *59*, 1009-1015.
- (10) Guerrini, L.; Garcia-Ramos, J. V.; Domingo, C.; Sanchez-Cortes, S. *Anal. Chem.* **2009**, *81*, 953-960.
- (11) Guerrini, L.; Garcia-Ramos, J. V.; Domingo, C.; Sanchez-Cortes, S. *J. Phys. Chem. C* **2008**, *112*, 7527-7530.
- (12) Leyton, P.; Cordova, I.; Lizama-Vergara, P. A.; Gomez-Jeria, J. S.; Aliaga, A. E.; Campos-Vallette, M. M.; Clavijo, E.; Garcia-Ramos, J. V.; Sanchez-Cortes, S. *Vib. Spectrosc.* **2008**, *46*, 77-81.
- (13) Xie, Y. F.; Wang, X.; Han, X. X.; Xue, X. X.; Ji, W.; Qi, Z. H.; Liu, J. Q.; Zhao, B.; Ozaki, Y. *Analyst* **2010**, *135*, 1389-1394.
- (14) Jones, C. L.; Bantz, K. C.; Haynes, C. L. *Anal. Bioanal. Chem.* **2009**, *394*, 303-311.
- (15) Costa, J. C. S.; Sant'Ana, A. C.; Corio, P.; Temperini, M. L. A. *Talanta* **2006**, *70*, 1011-1016.
- (16) Mosier-Boss, P. A.; Lieberman, S. H. *Anal. Chem.* **2005**, *77*, 1031-1037.
- (17) Olson, L. G.; Uibel, R. H.; Harris, J. M. *Appl. Spectrosc.* **2004**, *58*, 1394-1400.
- (18) Zhou, X.; Xu, W. L.; Wang, Y.; Kuang, Q.; Shi, Y. F.; Zhong, L. B.; Zhang, Q. Q. *J. Phys. Chem. C* **2010**, *114*, 19607-19613.
- (19) Zhao, X.; Shi, Y.; Cai, Y.; Mou, S. *Environ. Sci. Technol.* **2008**, *42*, 1201-1206.
- (20) Zhang, X. F.; Clime, L.; Ly, H. Q.; Trudeau, M.; Veres, T. *J. Phys. Chem. C* **2010**, *114*, 18313-18317.
- (21) Hu, H. B.; Wang, Z. H.; Pan, L.; Zhao, S. P.; Zhu, S. Y. *J. Phys. Chem. C* **2010**, *114*, 7738-7742.

- (22) Mandal, M.; Kundu, S.; Ghosh, S. K.; Panigrahi, S.; Sau, T. K.; Yusuf, S. M.; Pal, T. *J. Colloid Interface Sci.* **2005**, *286*, 187-194.
- (23) Xu, Z. C.; Hou, Y. L.; Sun, S. H. *J. Amer. Chem. Soc.* **2007**, *129*, 8698-8699.
- (24) Du, J. J.; Jing, C. Y. *J. Colloid Interface Sci.* **2011**, *358*, 54-61.
- (25) Pena, M.; Meng, X. G.; Korfiatis, G. P.; Jing, C. Y. *Environ. Sci. Technol.* **2006**, *40*, 1257-1262.
- (26) Ma, Z. Y.; Guan, Y. P.; Liu, H. Z. *J. Polym. Sci. Pol. Chem.* **2005**, *43*, 3433-3439.
- (27) Harada, M.; Kimura, Y.; Saijo, K.; Ogawa, T.; Isoda, S. *J. Colloid Interface Sci.* **2009**, *339*, 373-381.
- (28) Bryant, M. A.; Pemberton, J. E. *J. Amer. Chem. Soc.* **1991**, *113*, 8284-8293.
- (29) Bryant, M. A.; Pemberton, J. E. *J. Amer. Chem. Soc.* **1991**, *113*, 3629-3637.
- (30) Kaczor, A.; Malek, K.; Baranska, M. *J. Phys. Chem. C* **2010**, *114*, 3909-3917.
- (31) Oh, S. T.; Kim, K.; Kim, M. S. *J. Phys. Chem.* **1991**, *95*, 8844-8849.
- (32) Shinohara, H.; Yamakita, Y.; Ohno, K. *J. Mol. Struct.* **1998**, *442*, 221-234.
- (33) Onchoke, K. K.; Hadad, C. M.; Dutta, P. K. *J. Phys. Chem. A* **2006**, *110*, 76-84.
- (34) Sun, B.; Dreger, Z. A.; Gupta, Y. M. *J. Phys. Chem. A* **2008**, *112*, 10546-10551.
- (35) Guerrini, L.; Garcia-Ramos, J. V.; Domingo, C.; Sanchez-Cortes, S. *Anal. Chem.* **2009**, *81*, 953-960.
- (36) Alajtal, A. I.; Edwards, H. G. M.; Elbagerma, M. A.; Scowen, I. J. *Spectrochim. Acta, Part A* **2010**, *76*, 1-5.
- (37) Carron, K.; Peitersen, L.; Lewis, M. *Environ. Sci. Technol.* **1992**, *26*, 1950-1954.
- (38) Le Ru, E. C.; Blackie, E.; Meyer, M.; Etchegoin, P. G. *J. Phys. Chem. C* **2007**, *111*, 13794-13803.
- (39) Sverdrup, L. E.; Nielsen, T.; Krogh, P. H. *Environ. Sci. Technol.* **2002**, *36*, 2429-2435.
- (40) Sahu, S. K.; Pandit, G. G. *J. Liq. Chromatogr. Relat. Technol.* **2003**, *26*, 135-146.
- (41) Xia, G. S.; Ball, W. P. *Environ. Sci. Technol.* **1999**, *33*, 262-269.

Table 1. Detection limit of PAHs,  $K_{ow}$ , and peak position for quantitative analysis and calculation of enhancement factor.

| PAHs         | Conc.(mg/L) | Conc.( $\mu$ M) | EF <sup>a</sup>   | Peak (cm <sup>-1</sup> ) | log $K_{ow}$ <sup>39-41</sup> |
|--------------|-------------|-----------------|-------------------|--------------------------|-------------------------------|
| acridine     | 0.05        | 0.25            | $8 \times 10^5$   | 1401                     | /                             |
| perylene     | 0.2         | 0.8             | $1.2 \times 10^5$ | 1571                     | 6.40                          |
| BaP          | 0.2         | 0.8             | $8 \times 10^4$   | 1385                     | 6.20                          |
| pyrene       | 1.0         | 1               | $1.5 \times 10^4$ | 407                      | 5.20                          |
| anthracene   | 1.0         | 5               | $5 \times 10^3$   | 396                      | 4.20                          |
| phenanthrene | 5.0         | 20              | $1.5 \times 10^3$ | 410                      | 4.07                          |
| fluorene     | /           | /               | /                 | /                        | 3.96                          |
| naphthalene  | /           | /               | /                 | /                        | 3.32                          |
| benzene      | /           | /               | /                 | /                        | 2.13                          |

<sup>a</sup>: Enhance factor, calculated by the following equation: <sup>38</sup>

$$EF = (I_{SERS}/I_{RS})(C_{RS}/C_{SERS})$$

$I_{SERS}$ : Peak Intensity of the selected Raman band;

$I_{RS}$ : The corresponding band intensity of the PAHs neat;

$C_{RS}/C_{SERS}$ : The concentration ratio of the PAHs in neat solution and SERS sample.



## Figure Caption

Figure 1. Molecular structures of analytes in this study.

Figure 2. Schematic representation of the procedure for SERS detection of PAHs.

Figure 3. TEM micrographs of  $\text{Fe}_3\text{O}_4$  (a) and  $\text{Fe}_3\text{O}_4@\text{Ag}$  NPs (b). The HR-TEM image (inset) shows Ag shell thickness of 5 nm.

Figure 4.  $k^3$ -weighted observed (dotted line) and model calculated (solid line) Ag K-edge EXAFS spectra (I) and Fourier transform magnitude (II) resulting in a radial distance structure for  $\text{Fe}_3\text{O}_4@\text{Ag}$  NPs and pyrene reacted substrate.

Figure 5. (I) Raman spectrum of  $\text{Fe}_3\text{O}_4@\text{Ag}$  NPs (a) and C5 (b); SERS spectrum of C5 on  $\text{Fe}_3\text{O}_4@\text{Ag}$  NPs (c). (II) Raman spectrum of acridine (a); SERS spectrum of acridine on  $\text{Fe}_3\text{O}_4@\text{Ag}$  NPs (b) and C5 modified substrate (c). The concentration of acridine was 1 mg/L.

Figure 6. Schematic representations of adsorption mechanism for acridine.

Figure 7. Raman spectrum of  $\text{Fe}_3\text{O}_4@\text{Ag}$  (a); SERS spectrum of C5 on  $\text{Fe}_3\text{O}_4@\text{Ag}$  NPs (c); SERS spectrum of PAHs mixture on  $\text{Fe}_3\text{O}_4@\text{Ag}$  NPs (b) and  $\text{Fe}_3\text{O}_4@\text{Ag}@C5$  (d). “A” stands for main band of acridine.

Figure 8. (I) Raman spectrum of pyrene (a), BaP (c) and perylene (e); SERS difference spectrum of 1 mg/L pyrene (b), 200  $\mu\text{g/L}$  BaP (d) and 200  $\mu\text{g/L}$  perylene (f). (II) Raman spectrum of phenanthrene (a) and anthracene (c); SERS difference spectrum of 5 mg/L phenanthrene (b), and 1 mg/L anthracene (d). (III) Raman spectrum of benzene (a), naphthalene (c) and fluorene (e); SERS spectrum of 200 mg/L benzene (b), 50 mg/L naphthalene (d) and 50 mg/L fluorene (f).

Figure 9. Calibration curve for perylene (a), BaP (b), pyrene (c), anthracene (d), and phenanthrene (e). The dashed lines show the 95% confidence limits. The data points represented the average  $\pm$  standard deviation for ten randomly chosen points on substrate. Signal collecting time = 5 s.

Figure 10. Difference SERS spectra of PAHs at the concentration 1 mg/L (a), 10 mg/L (b) and PAHs extracted from the coal fly ash sample (c).

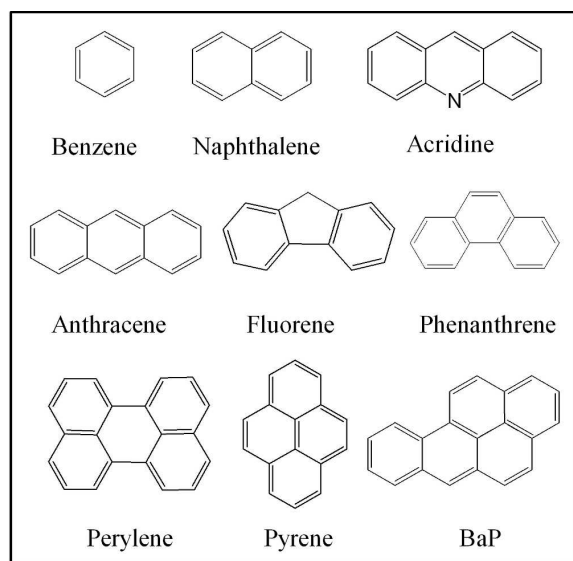

Figure 1.

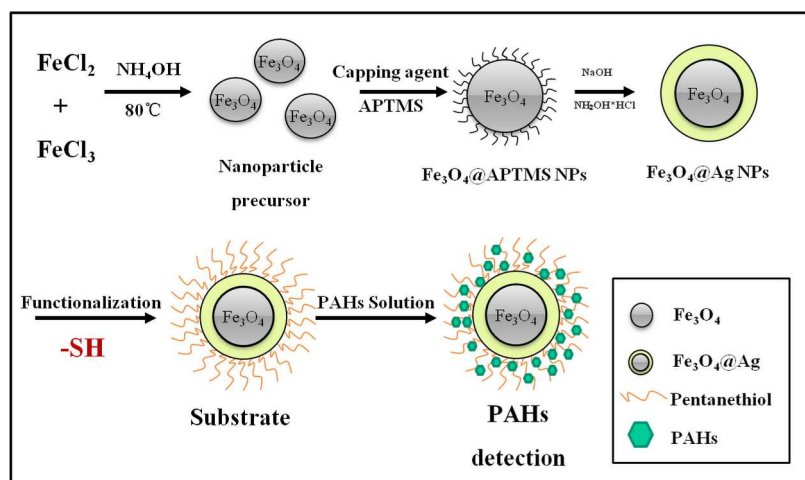

Figure 2.

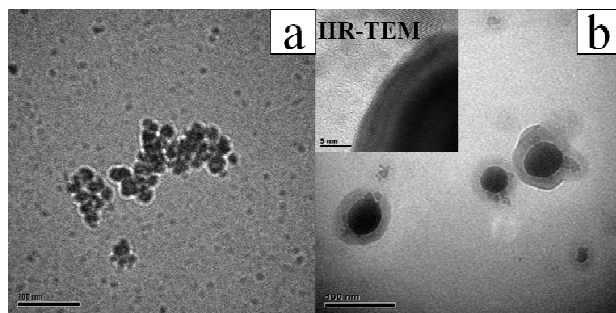

Figure 3.

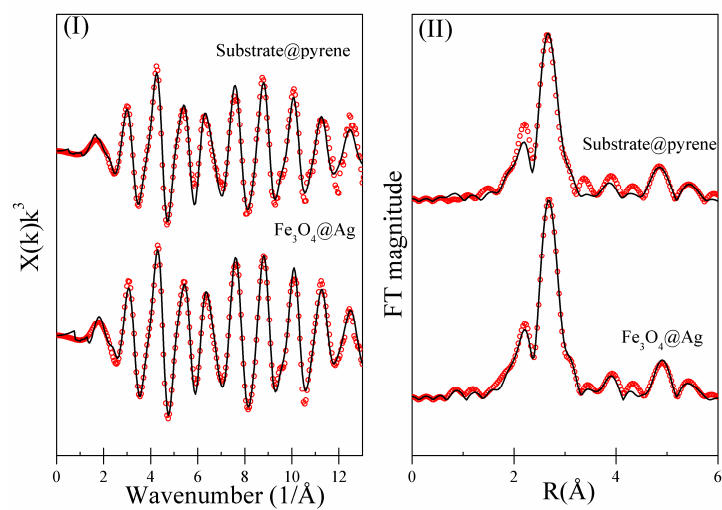

Figure 4.

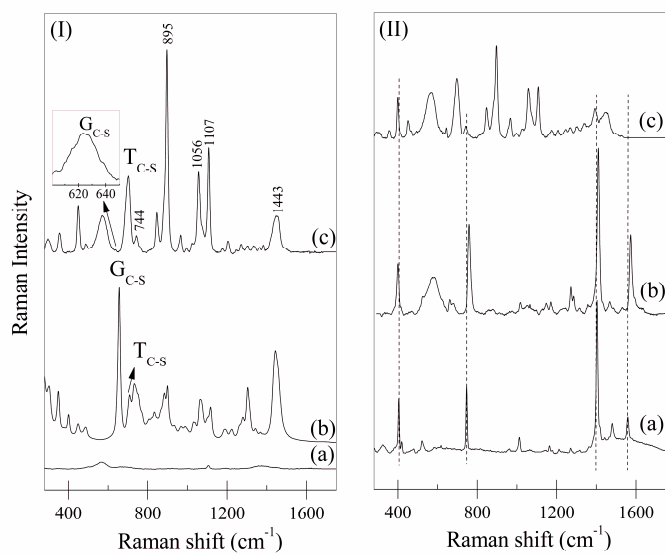

Figure 5.

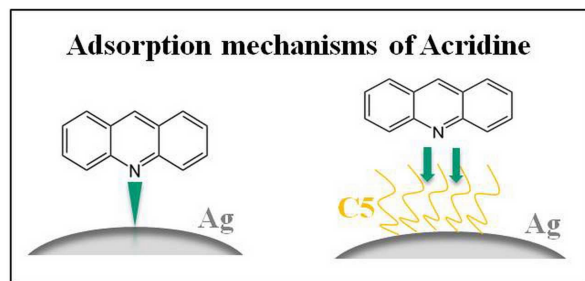

Figure 6

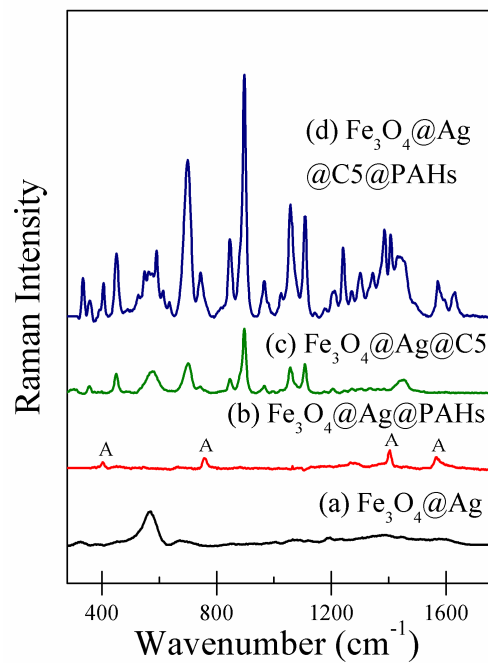

Figure 7.



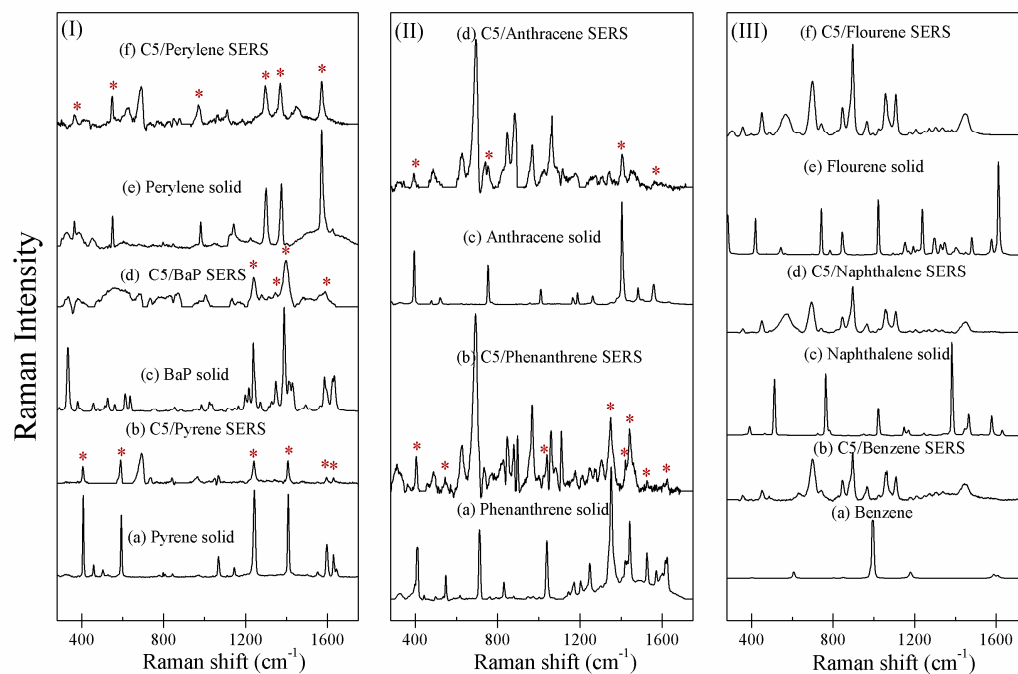

Figure 8.

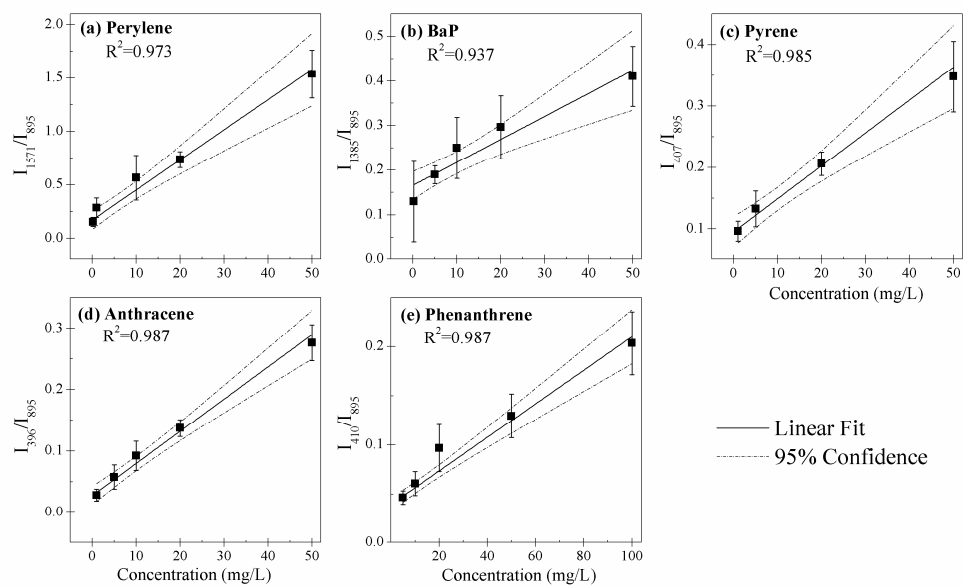

Figure 9.

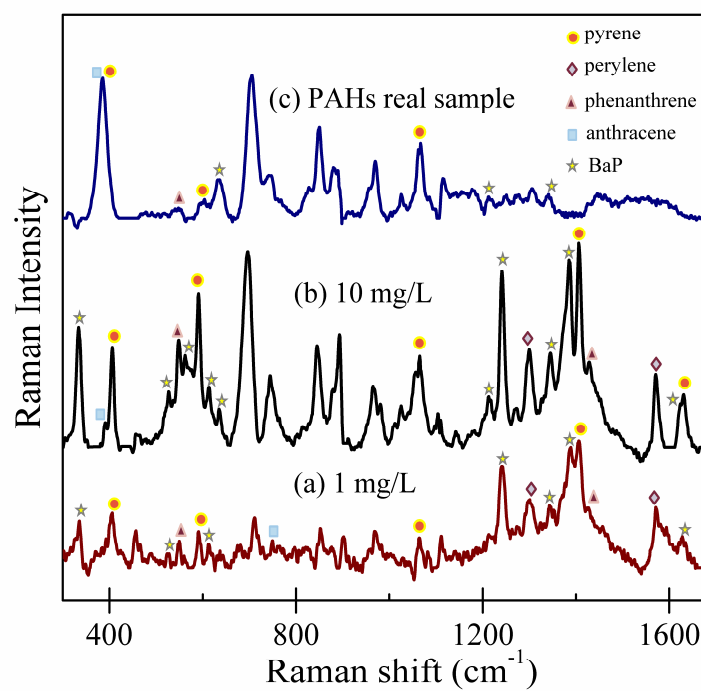

Figure 10

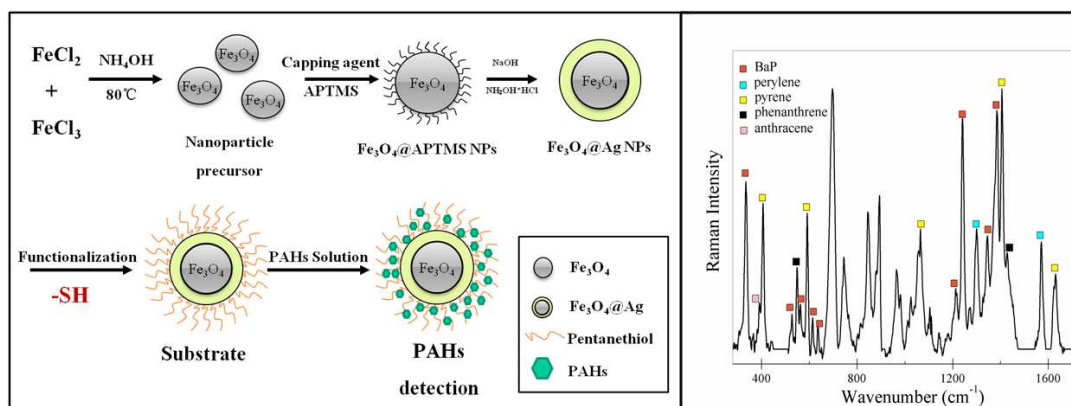

Supplement: Supplementary file 1 [file 4264267]
